# Supplementary material for: Three organic–inorganic polyoxoniobate-based compounds modified with Cu(ii) amine complexes: synthesis, characterization, and catalytic studies for oxidation of styrene
Source: Royal Society of Chemistry journal article supplement (doi:10.1039/d4dt02544j), 2024-01-01
Supplement: d4dt02544j1.pdf [file d4dt02544j1.pdf]

# Three Organic-Inorganic Polyoxoniobate-Based Compounds Modified With Cu(II) Amine Complexes: Synthesis, Characterization, And Catalytic Studies For Oxidation of Styrene

Zhi-cheng duan and Guahua Li, Ke-Chang Li, Xiao-Bing Cui,\*

*College of Chemistry and State Key Laboratory of Inorganic Synthesis and Preparative Chemistry, Jilin University, Changchun, Jilin, 130023, P. R. China. Email: [cuixb@mail.jlu.edu.cn](mailto:cuixb@mail.jlu.edu.cn).*

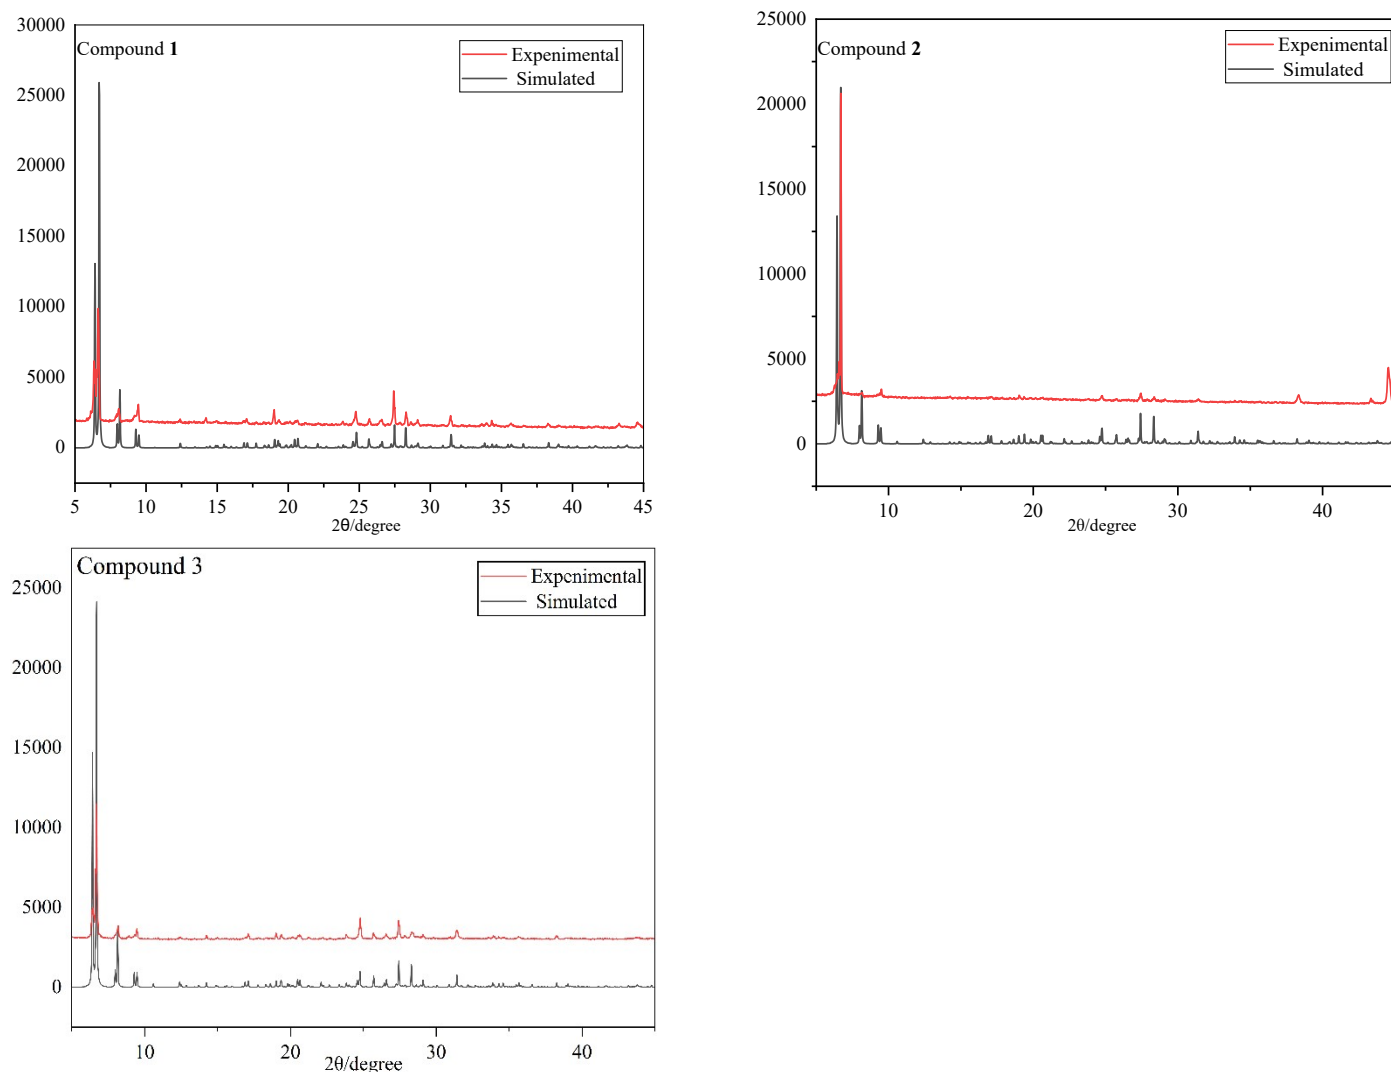

Fig. s1. The simulated and experimental patterns of compounds 1-3.

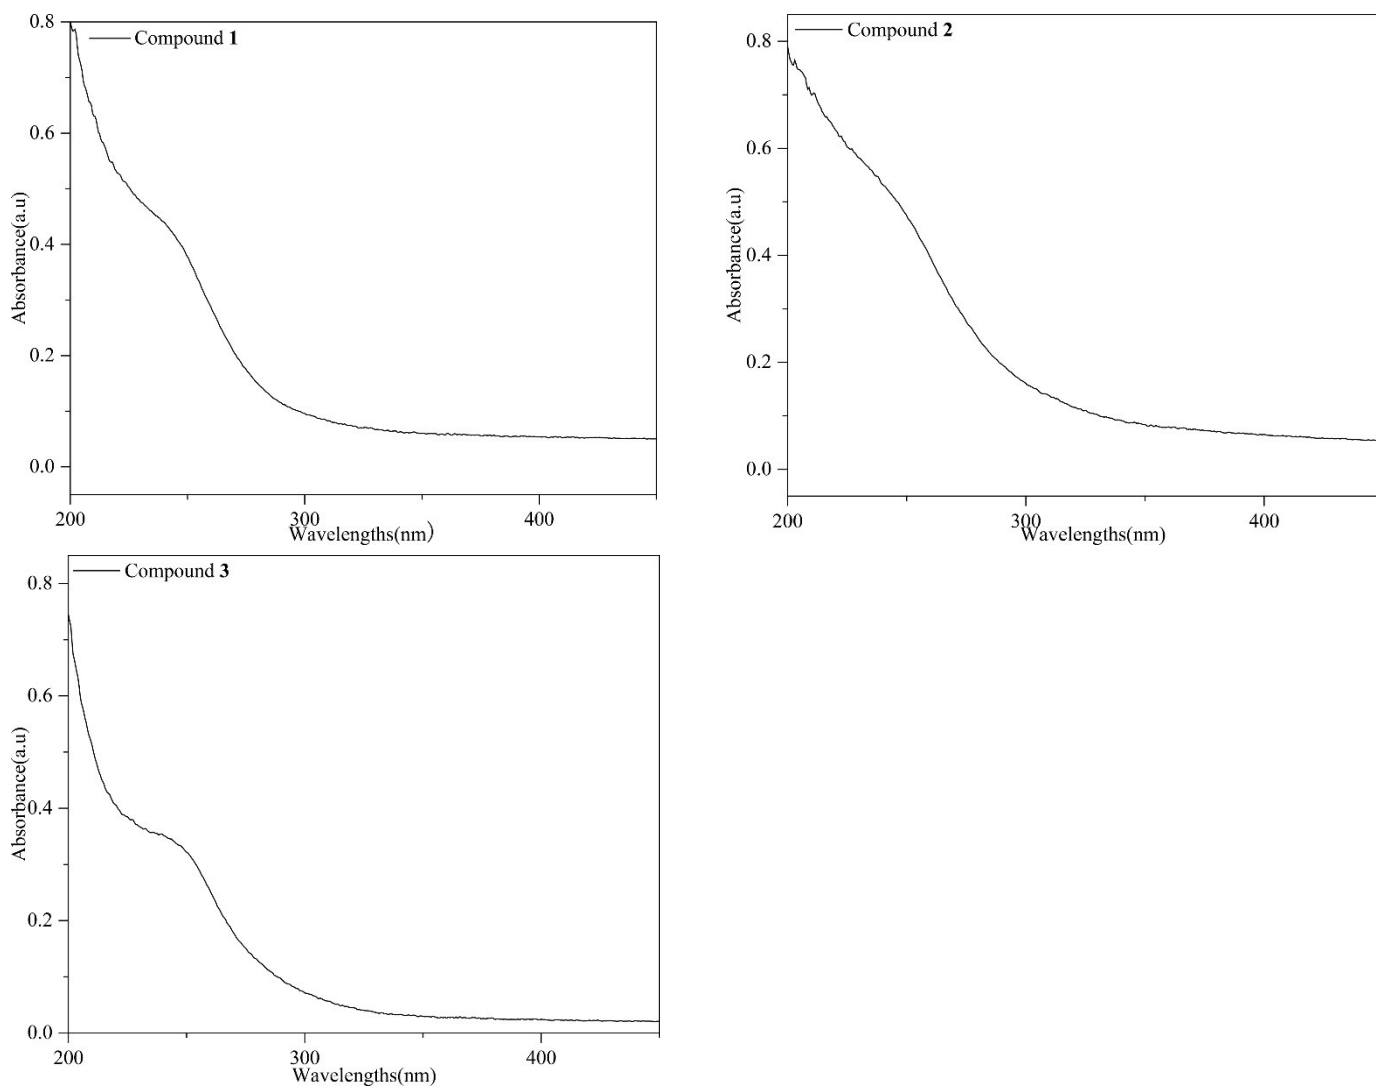

Fig. S2, The UV-Vis spectra of compounds 1-3.

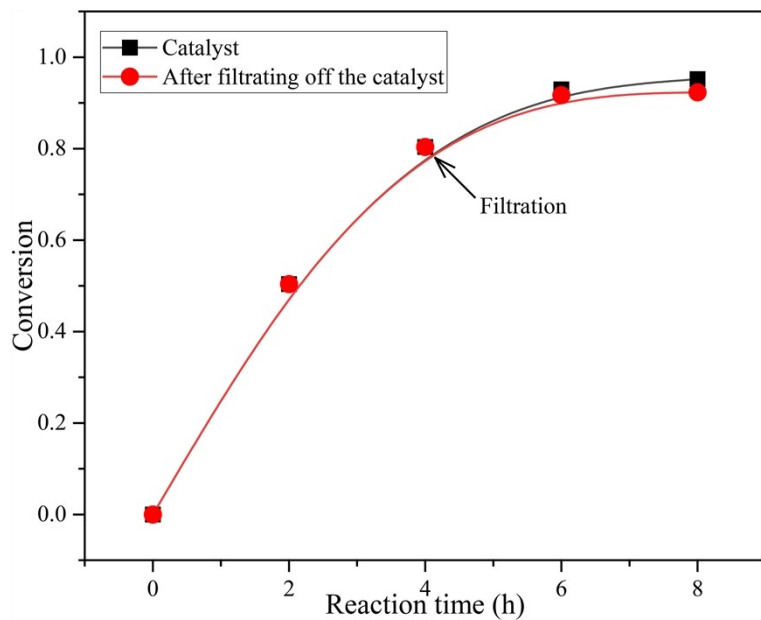

Fig. S3. Results of the hot filtration test of compound 1.

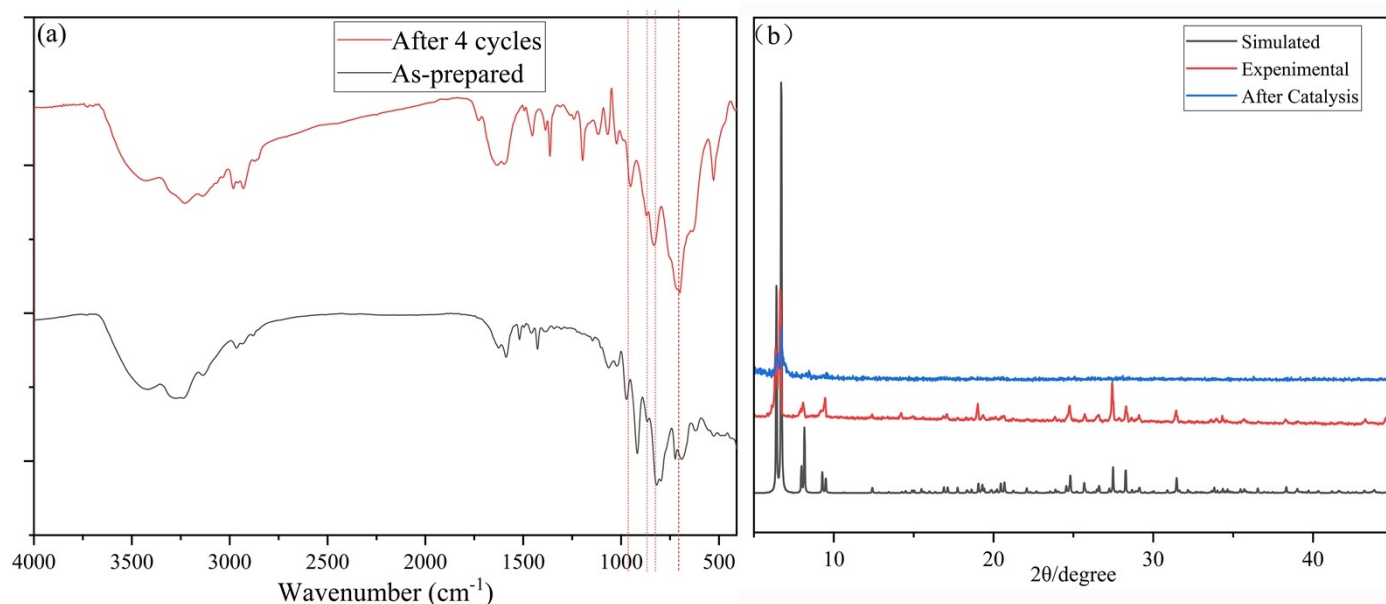

Fig. S4 Comparison of FT-IR spectra (a) and XRD patterns (b) of compound 1 before and after the 4 cycles.

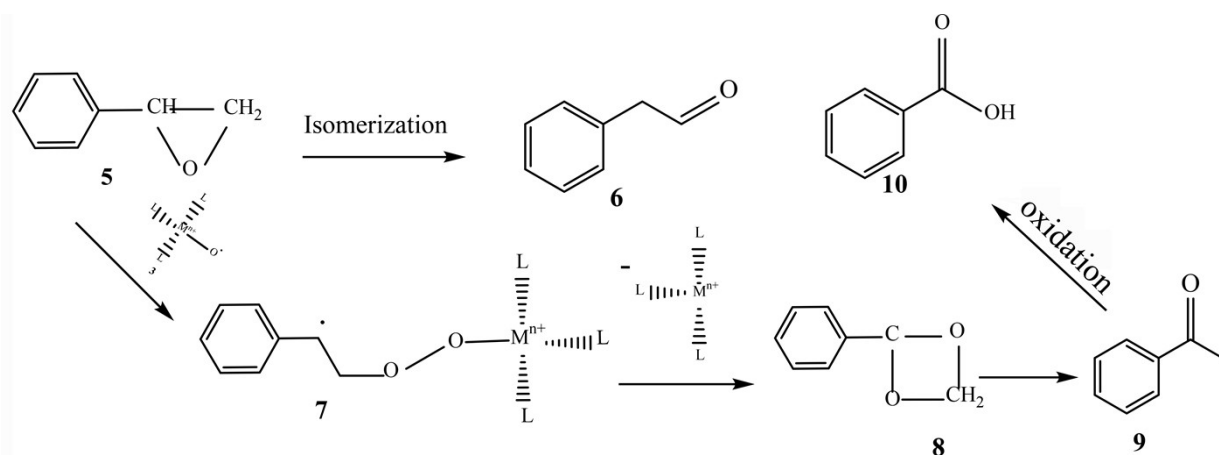

Fig. S5. The reactive metal cations present in the compounds undergoes a reaction with tert-butyl hydroperoxide (TBHP), resulting in the loss of a butanol molecule and the formation of a metal-containing oxygen radical. This radical subsequently interacts with the double-bonded carbon atom of styrene to form a metal epoxide intermediate (designated as species 4 in Fig 5 of the manuscript). Species 4 then undergoes O-M bond cleavage to form styrene oxide (5) and regenerate the catalyst. Within the catalytic process, the isomerization of styrene oxide can generate phenyl acetaldehyde (6), while Species 5 further reacts with metal oxygen radicals to generate Species 8, which then decomposes to form benzaldehyde (9). In addition, benzaldehyde can be further oxidized to produce benzoic acid (10) and so on.

Table S1 Crystal data and structure refinement for compounds 1-3.

| Identification code                 | 1                                                                                                                                                    | 2                                                                                                                                               | 3                                                                                                                                |
|-------------------------------------|------------------------------------------------------------------------------------------------------------------------------------------------------|-------------------------------------------------------------------------------------------------------------------------------------------------|----------------------------------------------------------------------------------------------------------------------------------|
| Empirical formula                   | C <sub>48</sub> H <sub>199</sub> N <sub>32</sub> O <sub>109.5</sub> Si <sub>2</sub> V <sub>8.5</sub> Cu <sub>8</sub> Nb <sub>24</sub> K <sub>2</sub> | C <sub>48</sub> H <sub>214</sub> N <sub>32</sub> O <sub>109</sub> P <sub>2</sub> V <sub>4</sub> Cu <sub>8</sub> Nb <sub>24</sub> K <sub>2</sub> | C <sub>48</sub> H <sub>214</sub> Cu <sub>8</sub> K <sub>2</sub> N <sub>32</sub> Nb <sub>24</sub> O <sub>109</sub> V <sub>6</sub> |
| Formula weight                      | 6282.91                                                                                                                                              | 6066.56                                                                                                                                         | 6106.50                                                                                                                          |
| Crystal system                      | tetragonal                                                                                                                                           | tetragonal                                                                                                                                      | tetragonal                                                                                                                       |
| Space group                         | I4/mcm                                                                                                                                               | I4/mcm                                                                                                                                          | I4/mcm                                                                                                                           |
| a/Å                                 | 26.3310(12)                                                                                                                                          | 26.3917(6)                                                                                                                                      | 26.3856(7)                                                                                                                       |
| b/Å                                 | 26.3310(12)                                                                                                                                          | 26.3917(6)                                                                                                                                      | 26.3856(7)                                                                                                                       |
| c/Å                                 | 27.573(4)                                                                                                                                            | 27.4474(12)                                                                                                                                     | 27.5212(19)                                                                                                                      |
| Volume/Å <sup>3</sup>               | 19117(3)                                                                                                                                             | 19117.7(12)                                                                                                                                     | 19160.3(17)                                                                                                                      |
| Z                                   | 4                                                                                                                                                    | 4                                                                                                                                               | 4                                                                                                                                |
| ρ <sub>calc</sub> g/cm <sup>3</sup> | 2.183                                                                                                                                                | 2.108                                                                                                                                           | 2.117                                                                                                                            |
| μ/mm <sup>-1</sup>                  | 16.827                                                                                                                                               | 2.585                                                                                                                                           | 2.654                                                                                                                            |
| F(000)                              | 12258.0                                                                                                                                              | 11896.0                                                                                                                                         | 11960.0                                                                                                                          |
| Radiation                           | CuKα (λ = 1.54178)                                                                                                                                   | MoKα (λ = 0.71073)                                                                                                                              | MoKα (λ = 0.71073)                                                                                                               |
| 2θ range for data collection/°      | 4.746 to 127.93                                                                                                                                      | 4.88 to 50.73                                                                                                                                   | 4.882 to 50.724                                                                                                                  |
| Index ranges                        | -30 ≤ h ≤ 27, -26 ≤ k ≤ 28, -31 ≤ l ≤ 27                                                                                                             | -31 ≤ h ≤ 22, -24 ≤ k ≤ 31, -32 ≤ l ≤ 33                                                                                                        | -31 ≤ h ≤ 31, -27 ≤ k ≤ 31, -33 ≤ l ≤ 33                                                                                         |

|                                         |                                                              |                                                              |                                                              |
|-----------------------------------------|--------------------------------------------------------------|--------------------------------------------------------------|--------------------------------------------------------------|
| Reflections collected                   | 28531                                                        | 36985                                                        | 60533                                                        |
| Independent reflections                 | 4164 [ $R_{\text{int}}=0.0562$ , $R_{\text{sigma}}=0.0413$ ] | 4613 [ $R_{\text{int}}=0.0474$ , $R_{\text{sigma}}=0.0255$ ] | 4630 [ $R_{\text{int}}=0.0439$ , $R_{\text{sigma}}=0.0179$ ] |
| Data/restraints/parameters              | 4164/19/320                                                  | 4613/0/321                                                   | 4630/21/322                                                  |
| GOF on $F^2$                            | 1.091                                                        | 1.114                                                        | 1.637                                                        |
| Final R indexes [ $I \geq 2\sigma(I)$ ] | $R_1 = 0.0622$ , $wR_2 = 0.1753$                             | $R_1 = 0.0642$ , $wR_2 = 0.1779$                             | $R_1 = 0.1007$ , $wR_2 = 0.2867$                             |
| Final R indexes [all data]              | $R_1 = 0.0812$ , $wR_2 = 0.1894$                             | $R_1 = 0.0821$ , $wR_2 = 0.2062$                             | $R_1 = 0.1367$ , $wR_2 = 0.3811$                             |

We performed multiple single-crystal diffraction tests for compound **3**. However, all the results obtained were suboptimal, exhibiting relatively high R-values. The present data submitted for review is the best one. Compounds **2** and **3** are isostructural, and the single crystal data for compound **2** is good enough. A comparison of the two crystal data can demonstrate the accuracy of the crystal data pertaining to compound **3**.

Table S2. BVS results of the independent Nb and V atoms in compounds 1-3

| Compound 1                                                                                                                                                                                                            |      |      |      |
|-----------------------------------------------------------------------------------------------------------------------------------------------------------------------------------------------------------------------|------|------|------|
| Nb(1)                                                                                                                                                                                                                 | 5.02 | V(3) | 3.84 |
| Nb(2)                                                                                                                                                                                                                 | 4.95 | V(8) | 3.85 |
| Nb(3)                                                                                                                                                                                                                 | 5.00 |      |      |
| Nb(4)                                                                                                                                                                                                                 | 5.06 |      |      |
| Compound 2                                                                                                                                                                                                            |      |      |      |
| Nb(1)                                                                                                                                                                                                                 | 4.97 | V(8) | 3.92 |
| 0.Nb(3)                                                                                                                                                                                                               | 4.95 |      |      |
| Nb(4)                                                                                                                                                                                                                 | 4.98 |      |      |
| Nb(5)                                                                                                                                                                                                                 | 5.07 |      |      |
| Compound 3                                                                                                                                                                                                            |      |      |      |
| Nb(2)                                                                                                                                                                                                                 | 4.93 | V(1) | 4.27 |
| Nb(3)                                                                                                                                                                                                                 | 4.84 | V(3) | 5.37 |
| Nb(4)                                                                                                                                                                                                                 | 4.98 |      |      |
| Nb(5)                                                                                                                                                                                                                 | 5.14 |      |      |
| For compound 1, 2 and 3, the equations used for the BVS of Nb are $s=\exp[(r_0-r)/0.37]$ ( $r_0=1.911$ ), <sup>†</sup> the equations used for the BVS of V are $s=\exp[r_0-r)/0.37]$ , and $r_0=1.803$ . <sup>†</sup> |      |      |      |

Table S3. Catalytic performances with different olefin substrates.

| Entry | Substrate                                                                           | Conv. (%) | Sel. (%)                |                   |                    |            |                  |
|-------|-------------------------------------------------------------------------------------|-----------|-------------------------|-------------------|--------------------|------------|------------------|
|       |                                                                                     |           | 1,2-Epoxycyclooctane(%) |                   |                    |            |                  |
| 1     | 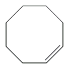 | 76.2      | 42.4                    |                   |                    |            |                  |
|       |                                                                                     |           |                         |                   |                    |            |                  |
| Entry | Substrate                                                                           | Conv. (%) | Sel. (%)                |                   |                    |            |                  |
|       |                                                                                     |           | Cyclohexeneoxide        | 2-Cyclohexen-1-ol | 2-Cyclohexen-1-one |            |                  |
| 2     | 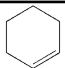 | 95.7      | 0.8                     | 22.7              | 2.2                |            |                  |
|       |                                                                                     |           |                         |                   |                    |            |                  |
| Entry | Substrate                                                                           | Conv. (%) | Sel. (%)                |                   |                    |            |                  |
|       |                                                                                     |           | 1,2-Epoxyoctae          | Octanal           | Heptanal           | 2-Octanone | n-Heptanoic acid |
| 3     | 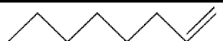 | 90.5      | 2.8                     | 1.4               | 2.6                | 0          | 0                |

Reaction Conditions: substrate (1 mmol), catalyst (2.0 mg), TBHP (2 mM, 274  $\mu$ L), acetonitrile (2 mL), toluene (1 mmol), 80  $^{\circ}$ C, 8 h reaction time.

1. I. D. Brown and D. Altermatt, Bond-Valence Parameters Obtained from a Systematic Analysis of the Inorganic Crystal Structure Database *Acta. Cryst.*, 1985, **B41**, 244-247.
